# Supplementary material
Source: MDPI journal article supplement (https://www.mdpi.com/2079-9276/12/2/17)
Supplement: s1 [file s1]

**Supplementary materials:**

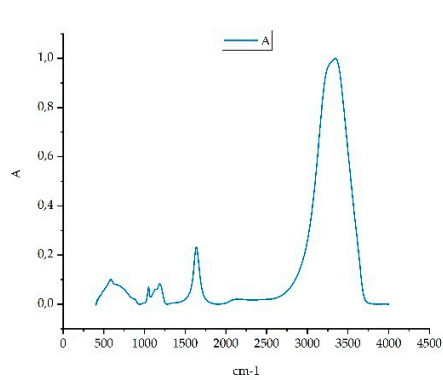

PTS 1

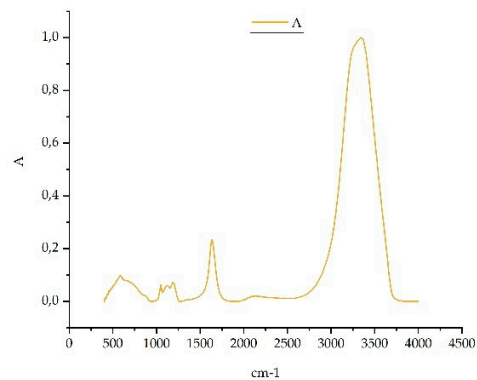

PTS 2

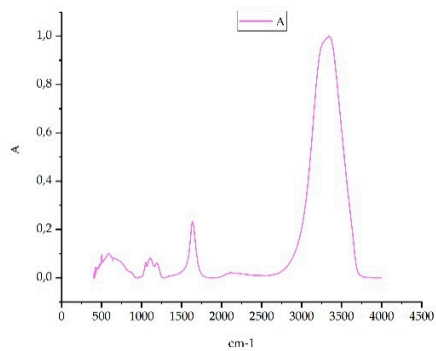

PTS 3

Figure S1: FTIR analysis of PTS with different ratio (a) PTS 1:1 ratio, (b) PTS 1:2 ratio and (c) PTS 1:3 ratio

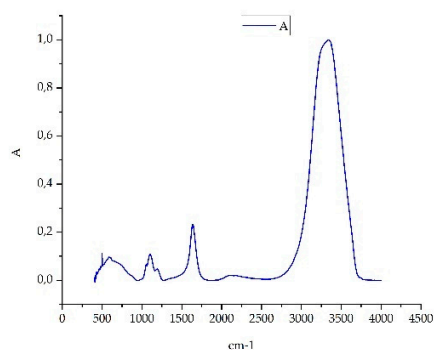

a. PTS 4

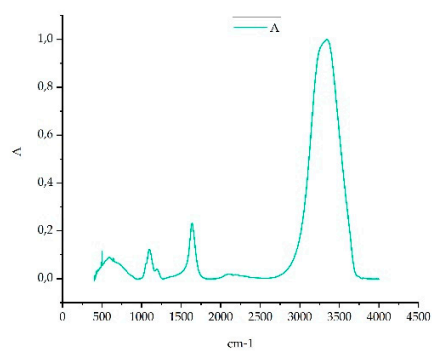

b. PTS 5

Figure S2: FTIR analysis of PTS with different ratio (a) PTS 1:4 ratio, (b) PTS 1:5 ratio

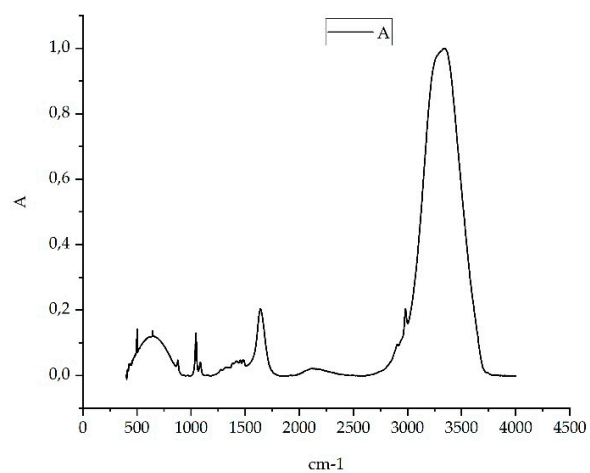

Figure S3: FTIR analysis of synthesized Ce-CTA material

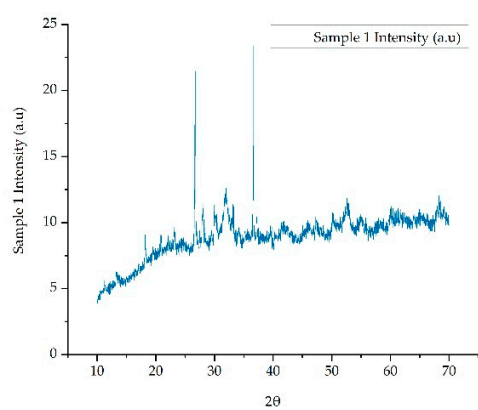

a.

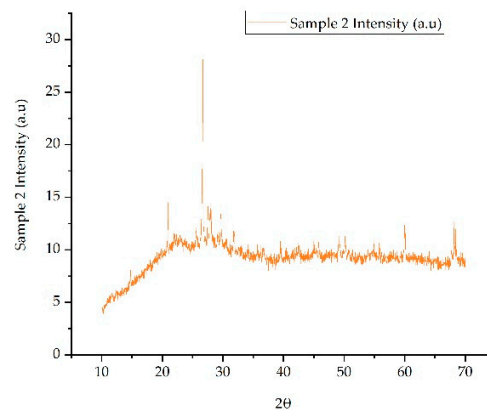

b.

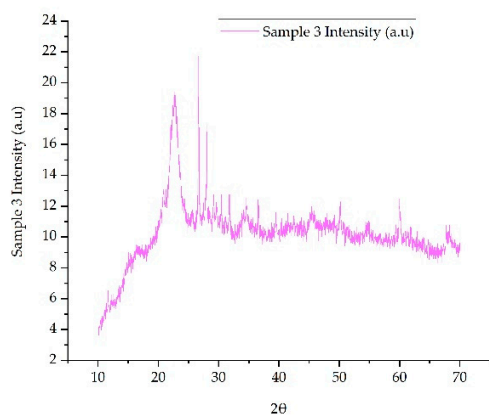

c.

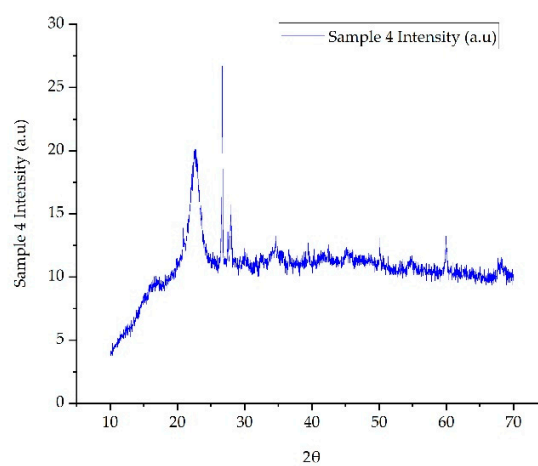

d.

Figure S4: XRD analysis of sludge materials after coagulation-flocculation at pH 3 (a) Sample 1 – raw sludge (b) Sample 2 with PTS only, (c) Sample 3 with Ce-CTA and (d) Sample 4 with PTS+Ce-CTA

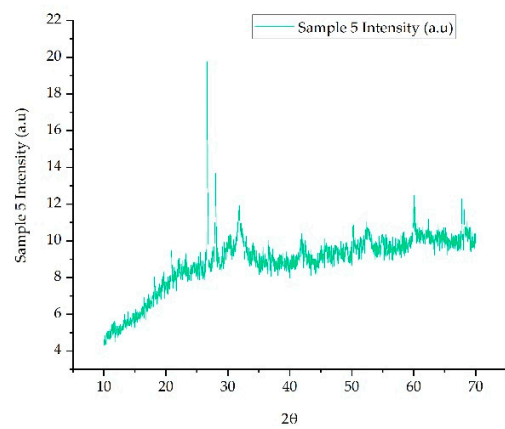

a.

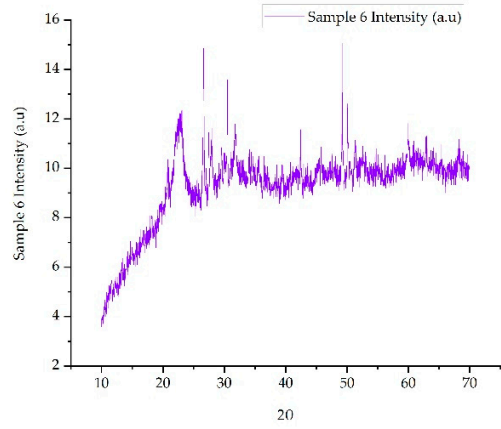

b.

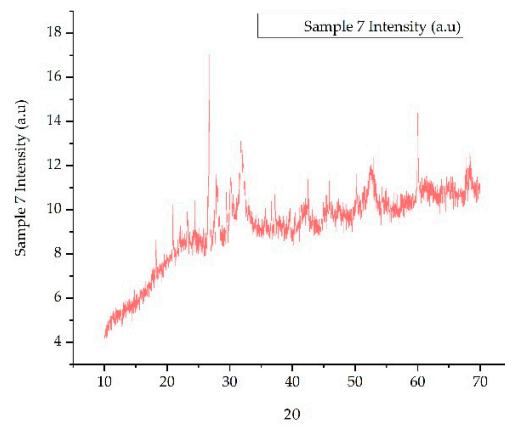

c.

Figure S5: XRD analysis of sludge materials after coagulation-flocculation at pH 6 (a) Sample 5 with PTS only, (b) Sample 6 with Ce-CTA and (c) Sample 7 with PTS+Ce-CTA

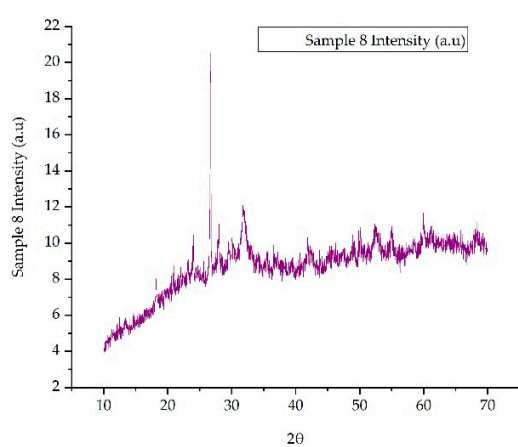

a.

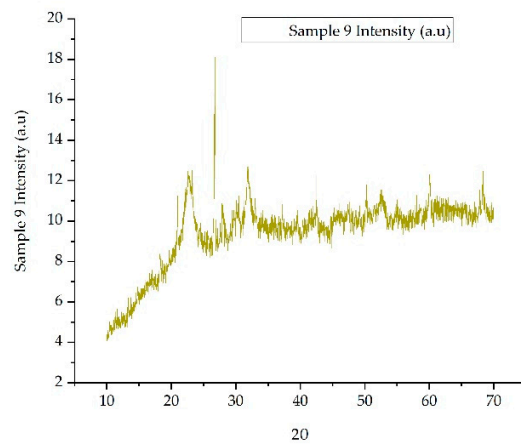

b.

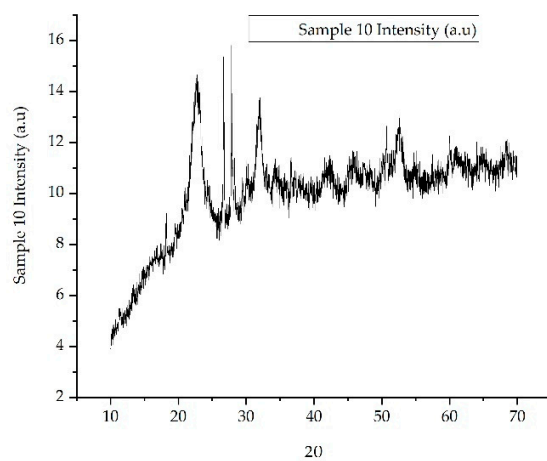

c.

Figure S6: XRD analysis of sludge materials after coagulation-flocculation at pH 9 (a)) Sample 8 with PTS only, (b) Sample 9 with Ce-CTA and (c) Sample 10 with PTS+Ce-CTA
